# Supplementary material
Source: Royal Society of Chemistry journal article supplement (doi:10.1039/d6ta01955b)
Supplement: d6ta01955b1.pdf [file d6ta01955b1.pdf]

## Supporting information

### Investigation of the dynamics in $\text{KSiH}_3$ and new bi-anionic $\text{K}[\text{SiH}_3]_{1-x}[\text{BH}_4]_x$ complex hydrides by MAS-NMR spectroscopy

Alexandre BERNARD,<sup>a,c</sup> Hanyu HU,<sup>b</sup> Matthias JOLLAIN,<sup>a</sup> Thibault CHARPENTIER,<sup>b</sup> Fermin CUEVAS,<sup>c</sup> Romain MOURY,<sup>c</sup> Raphaël JANOT<sup>a,\*</sup>

*a) Laboratoire de Réactivité et de Chimie des Solides (LRCS), UMR 7314 CNRS, Université de Picardie Jules Verne, 80039 Amiens, FRANCE*

*b) Université Paris-Saclay, CEA, CNRS, NIMBE, 91191 Gif-sur-Yvette cedex, FRANCE*

*c) Institut de Chimie des Matériaux de Paris-Est (ICMPE), UMR 7182 CNRS, 2-8 rue Henri Dunant, 94320 Thiais, France*

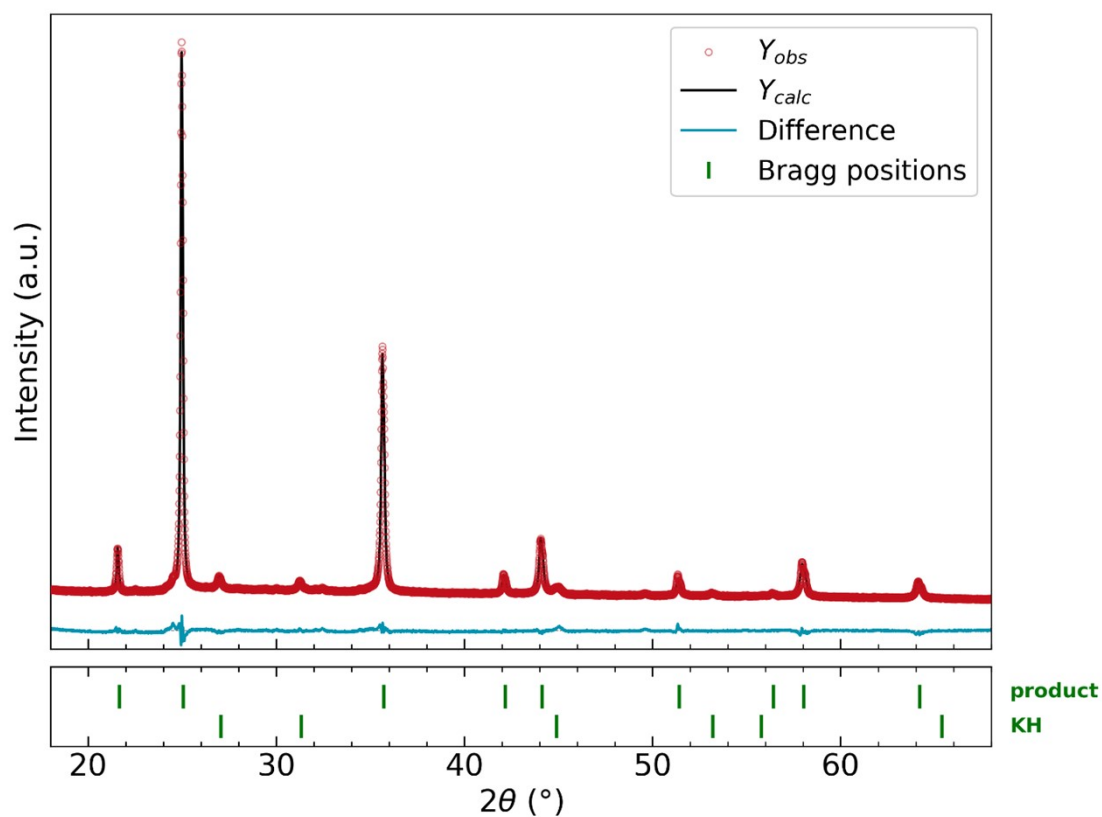

**Figure S1.** Rietveld refinement of  $\text{K}[\text{SiH}_3]_{0.75}[\text{BH}_4]_{0.25}$

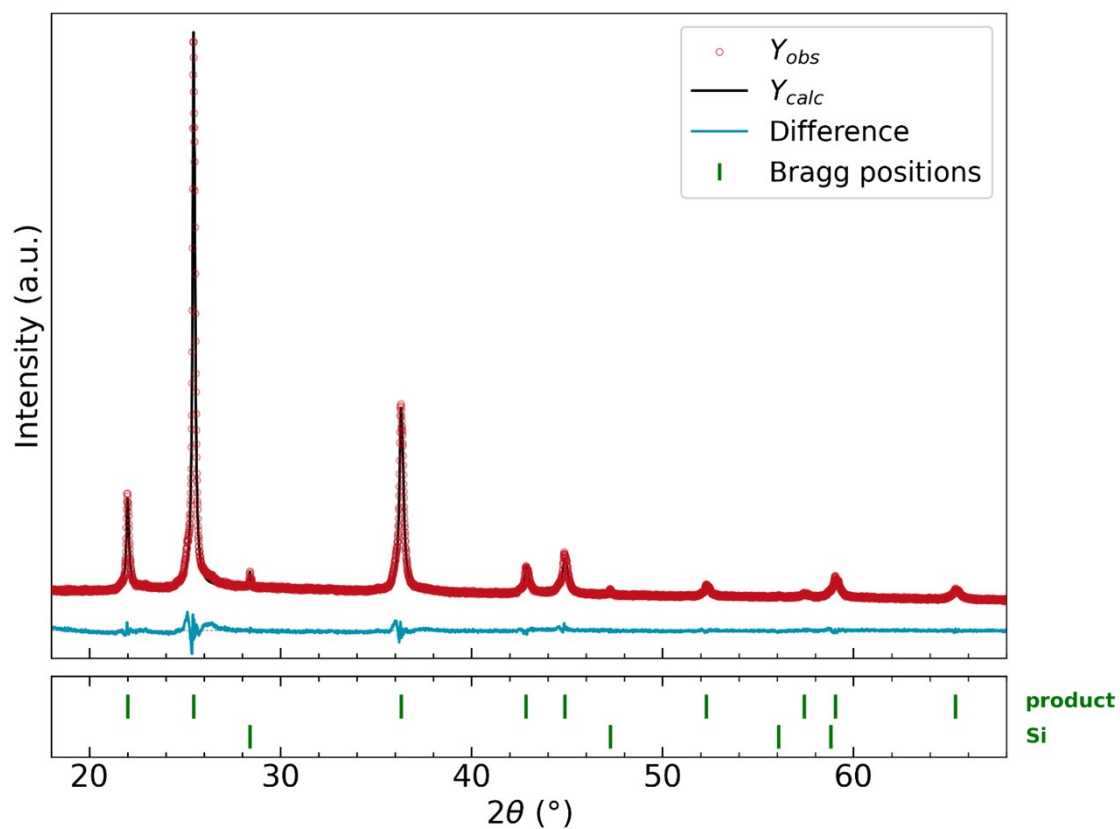

**Figure S2.** Rietveld refinement of  $K[SiH_3]_{0.5}[BH_4]_{0.5}$

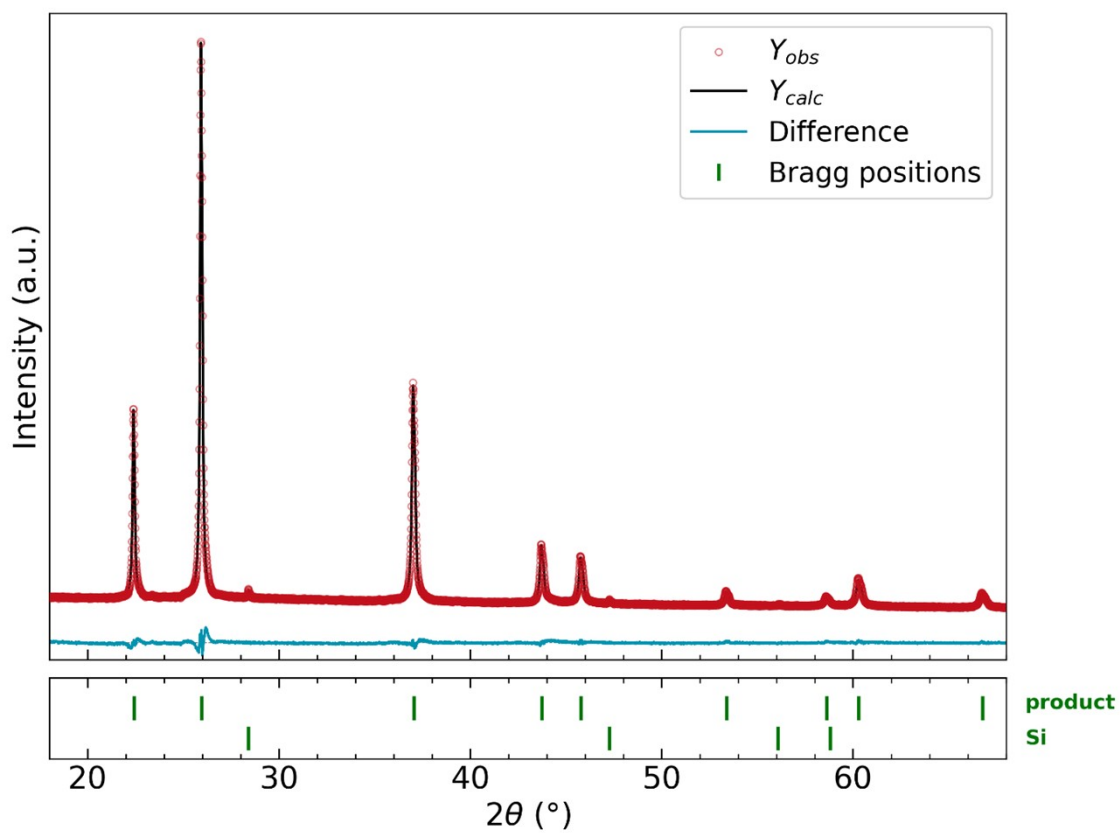

**Figure S3.** Rietveld refinement of  $K[SiH_3]_{0.25}[BH_4]_{0.75}$

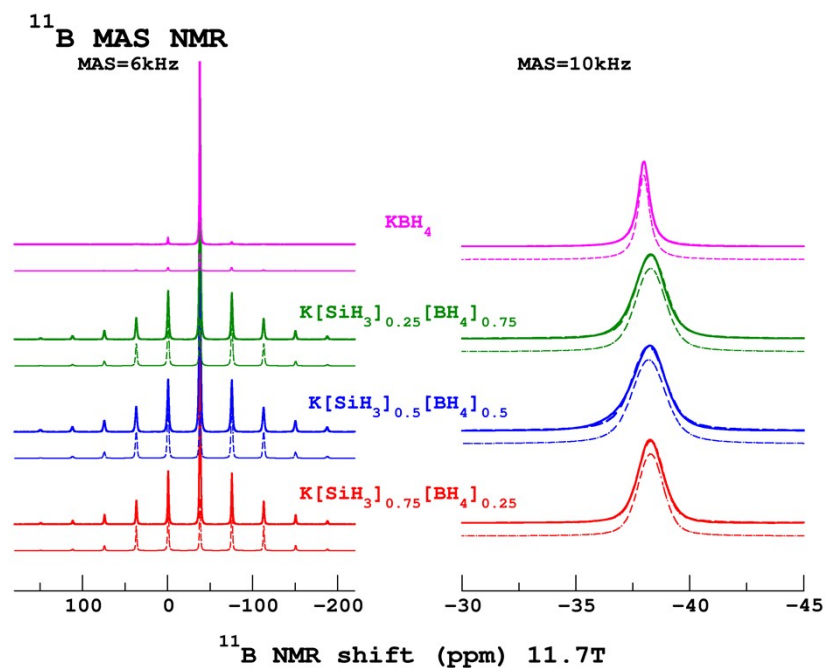

**Figure S4.**  $^{11}\text{B}$  MAS NMR spectra acquired at 6 kHz and 12.5 kHz of  $\text{K}[\text{SiH}_3]_{0.75}[\text{BH}_4]_{0.25}$  (red),  $\text{K}[\text{SiH}_3]_{0.5}[\text{BH}_4]_{0.5}$  (blue),  $\text{K}[\text{SiH}_3]_{0.25}[\text{BH}_4]_{0.75}$  (green), and  $\text{KBH}_4$  (magenta). The dashed lines represent the simulation spectra used to extract the NMR parameters (cf. Table 2 in the main text).

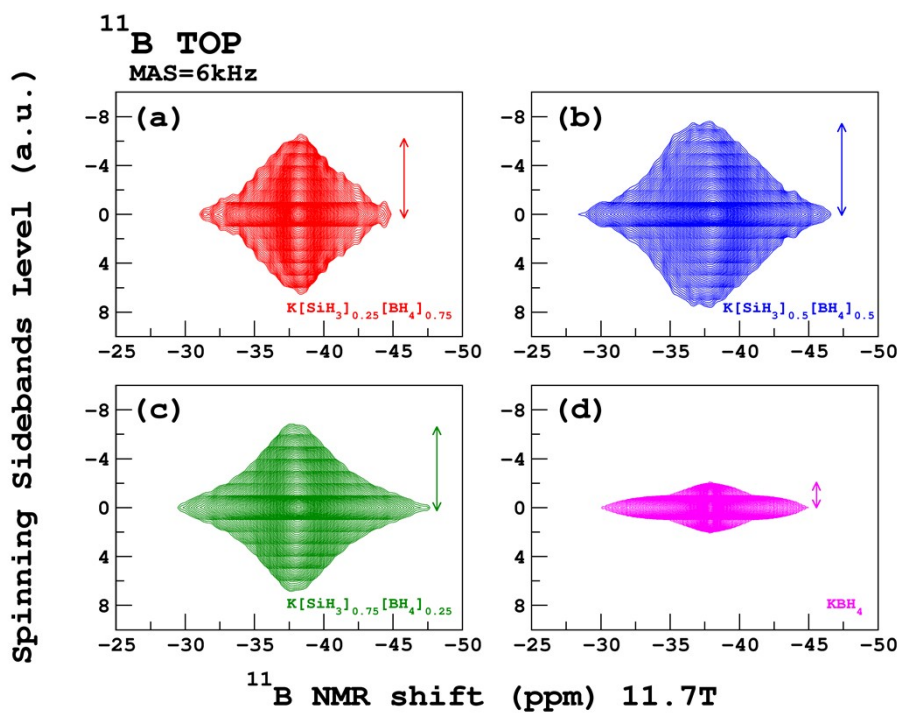

**Figure S5.** (a-d)  $^{11}\text{B}$  Two-Dimensional One Pulse (TOP) spectra reconstructed from MAS-NMR spectra acquired at a spinning frequency of 6 kHz.

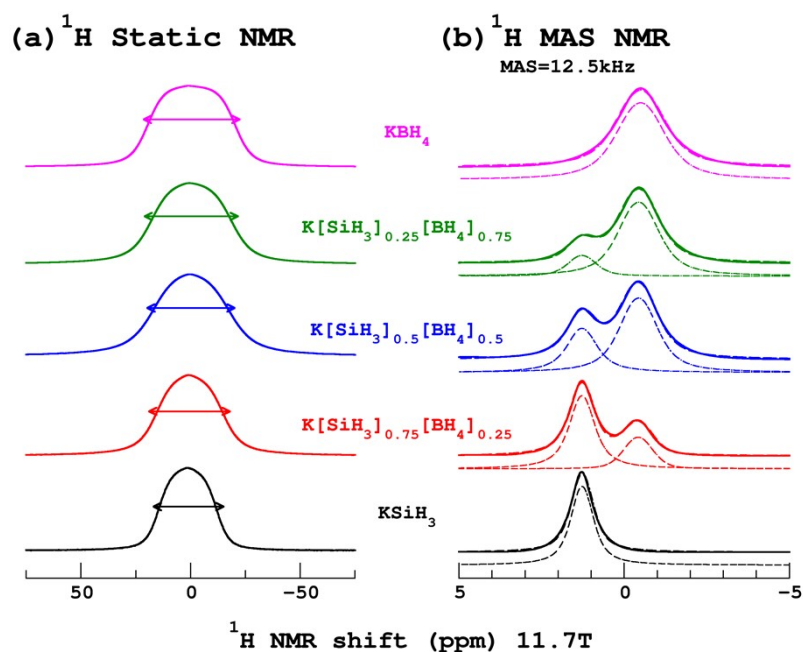

**Figure S6.** (a)  $^1\text{H}$  static and (b)  $^1\text{H}$  MAS NMR spectra of  $\text{KSiH}_3$  (black),  $\text{K}[\text{SiH}_3]_{0.75}[\text{BH}_4]_{0.25}$  (red),  $\text{K}[\text{SiH}_3]_{0.5}[\text{BH}_4]_{0.5}$  (blue),  $\text{K}[\text{SiH}_3]_{0.25}[\text{BH}_4]_{0.75}$  (green), and  $\text{KBH}_4$  (magenta). The arrows indicate the FWHM values of static spectra, and the dashed lines represent the simulations.

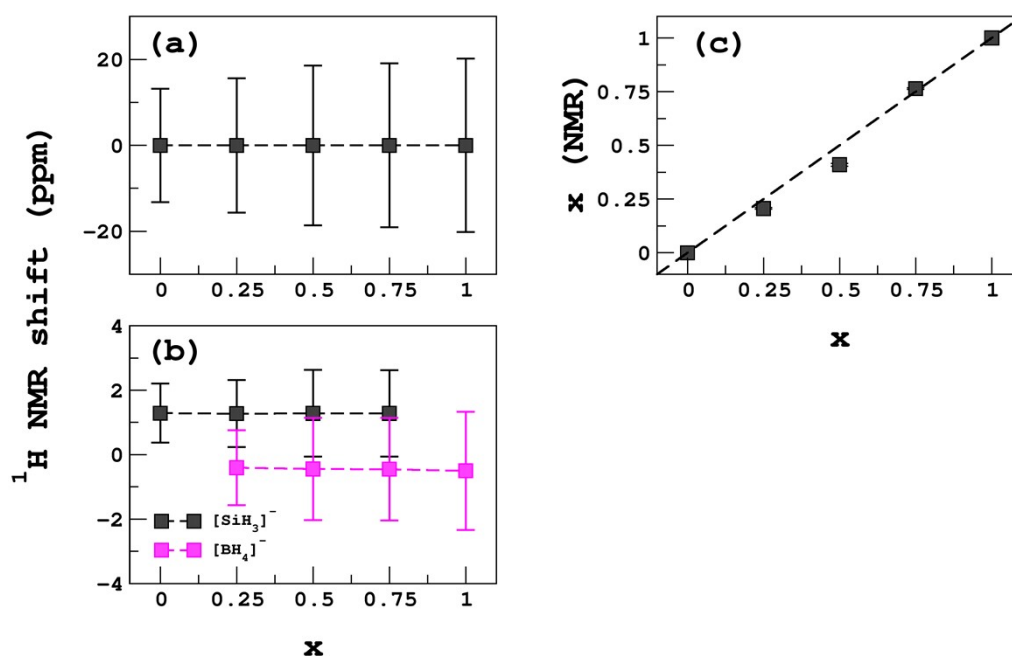

**Figure S7.** (a-b) the evolution of chemical shift of  $^1\text{H}$  in static and MAS NMR, respectively, with error bar corresponding to the FWHM. (c) Experimental  $x$  values calculated from NMR versus theoretical  $x$ .

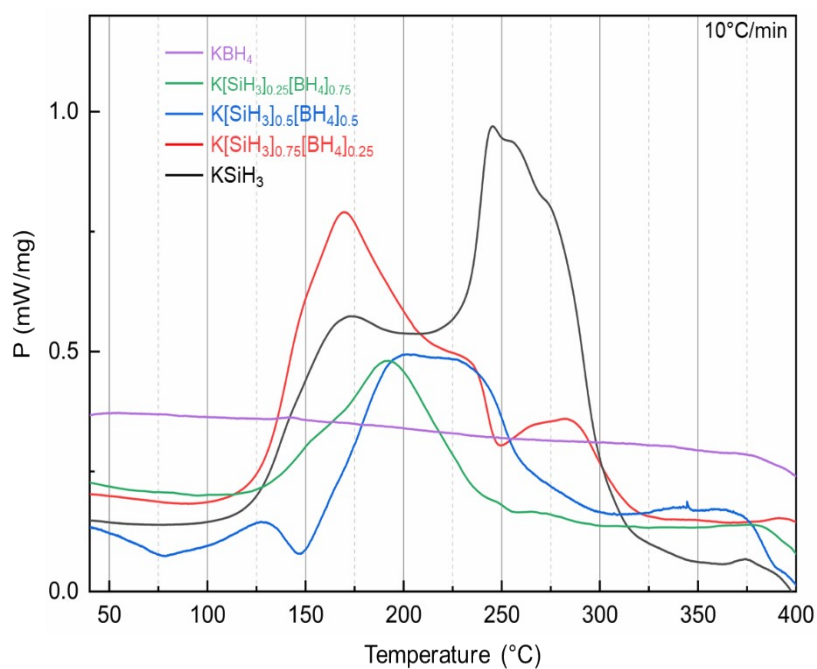

**Figure S8.** Differential scanning calorimetry of  $\text{KBH}_4$ ,  $\text{KSiH}_3$  and  $\text{K}[\text{SiH}_3]_{1-x}[\text{BH}_4]_x$  with  $x = 0.25, 0.5, 0.75$ .

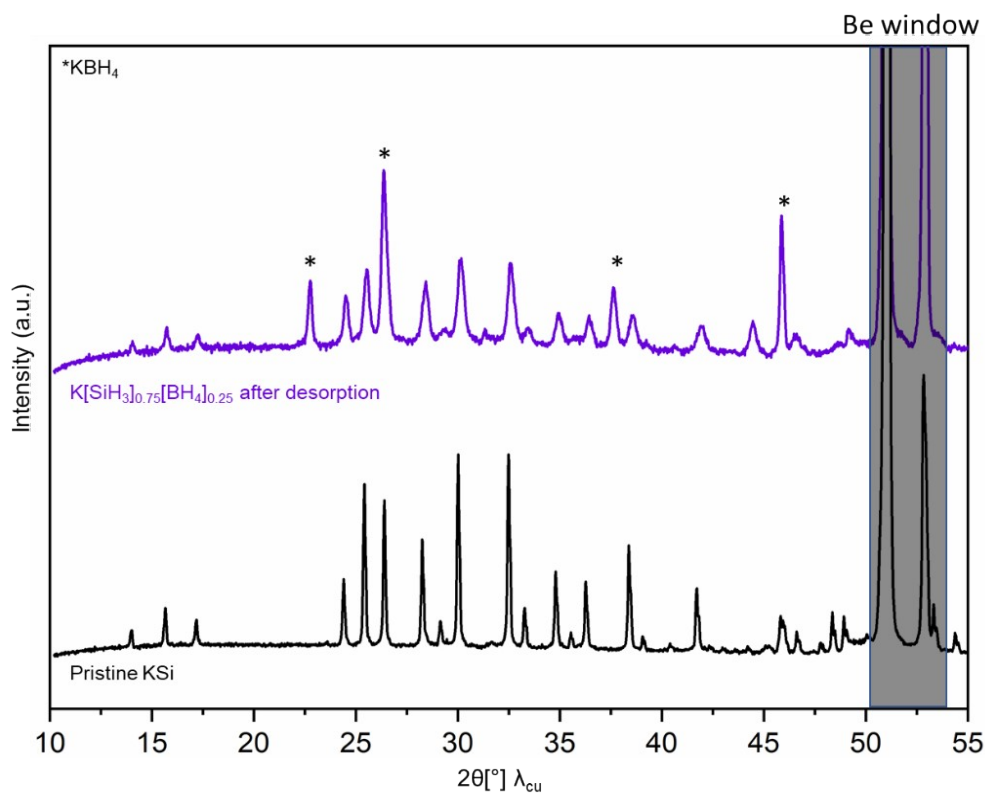

**Figure S9.** XRD patterns of  $\text{K}[\text{SiH}_3]_{0.75}[\text{BH}_4]_{0.25}$  after desorption at  $240^\circ\text{C}$  and pristine  $\text{KSi}$  as reference.
